# Supplementary material for: Electrodeposition of High-Quality Ni/SiC Composite Coatings by Using Binary Non-Ionic Surfactants
Source: MDPI journal article supplement (doi:10.3390/molecules28083344), 2023-04-10
Supplement: s1 [file s1]

Supplementary Information for

## Electrodeposition of high-quality Ni/SiC composite coatings by using binary non-ionic surfactants

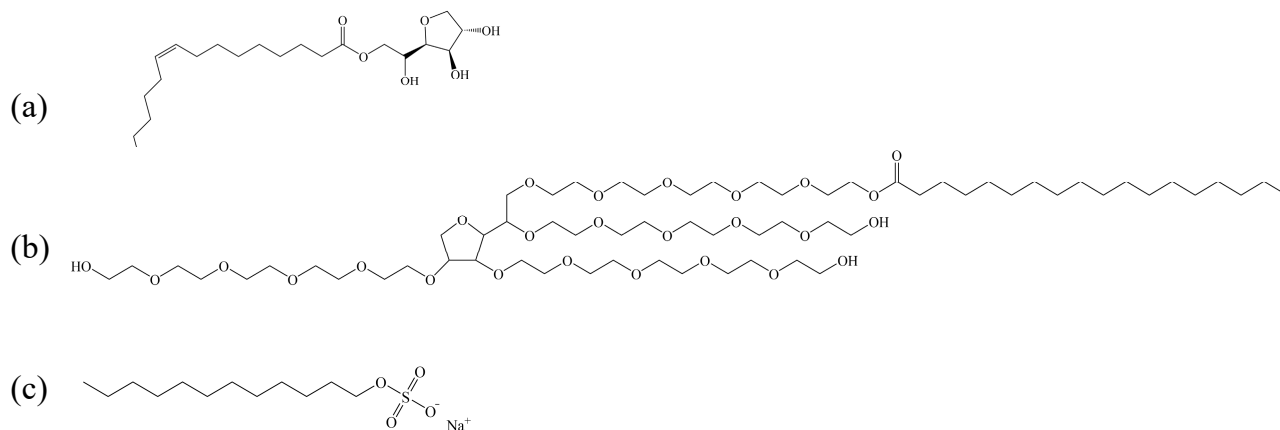

**Figure S1** Molecular structure of (a) Span 80, (b) Tween 60 and (c) SDS

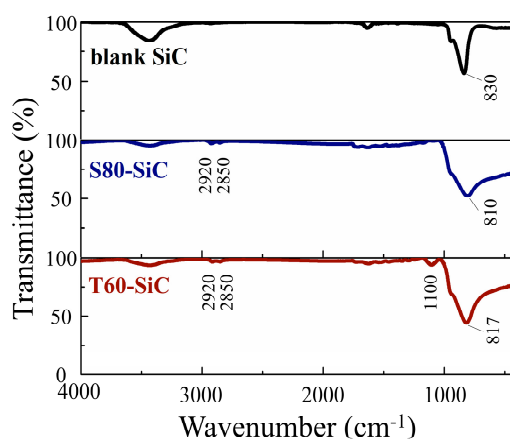

**Figure. S2** Fourier-transform infrared spectra of SiC particles before and after modification with Span 80 and Tween 60, respectively

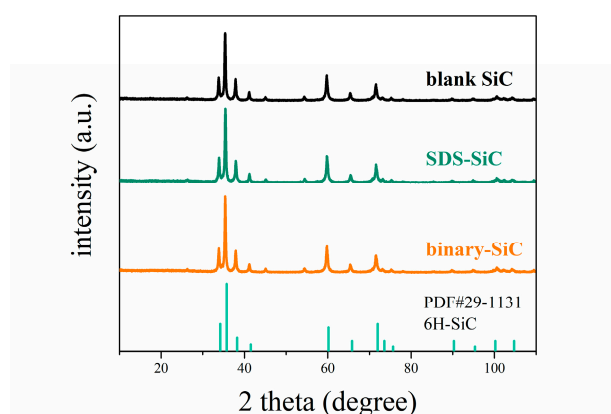

**Figure S3** XRD patterns of blank SiC, SD-SiC and binary-SiC

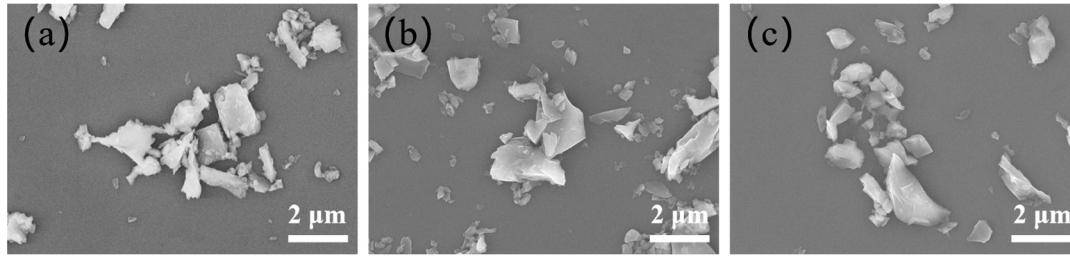

**Figure. S4** SEM images of (a) blank SiC, SiC dispersed with (b) SDS and (c) binary surfactants.

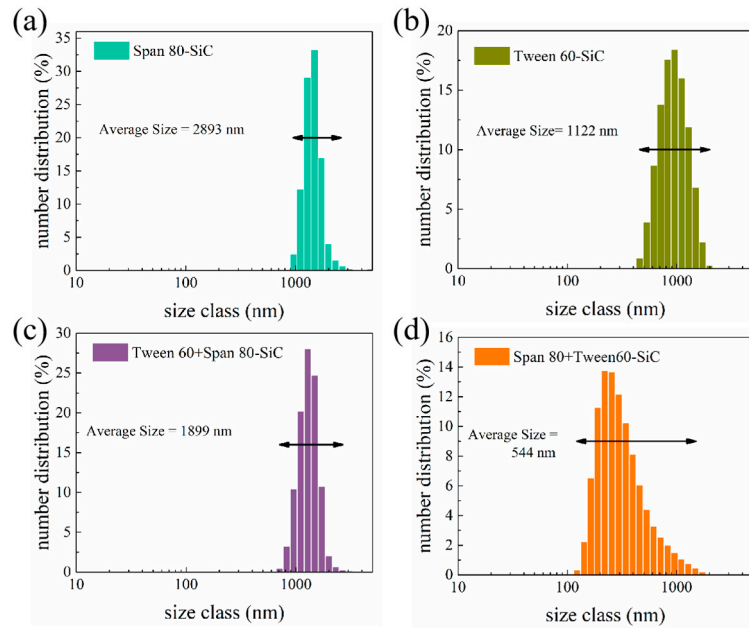

**Figure. S5** particle size distribution of SiC dispersed with (a) Span 80, (b) Tween 60, (c) Tween 60+ Span 80 and (d) Span 80+Tween 60(binary surfactant). “+” means consecutive treatments.

**Table S1** SiC content of composite coatings

| Composite coatings                  |     | Ni/SDS-SiC |     |     |      | Ni/binary-SiC |     |     |  |
|-------------------------------------|-----|------------|-----|-----|------|---------------|-----|-----|--|
| Current density(A/dm <sup>2</sup> ) | 2.0 | 4.0        | 6.0 | 8.0 | 2.0  | 4.0           | 6.0 | 8.0 |  |
| SiC content (wt%)                   | 2.7 | 3.9        | 1.6 | 1.1 | 10.8 | 9.9           | 8.4 | 7.5 |  |

**Table S2** Surface roughness of composite coatings

| Composite coatings                  |     | Ni/SDS-SiC |     |     |     | Ni/binary-SiC |     |     |  |
|-------------------------------------|-----|------------|-----|-----|-----|---------------|-----|-----|--|
| Current density(A/dm <sup>2</sup> ) | 2.0 | 4.0        | 6.0 | 8.0 | 2.0 | 4.0           | 6.0 | 8.0 |  |
| Surface roughness (nm)              | 77  | 146        | 111 | 168 | 55  | 62            | 52  | 50  |  |

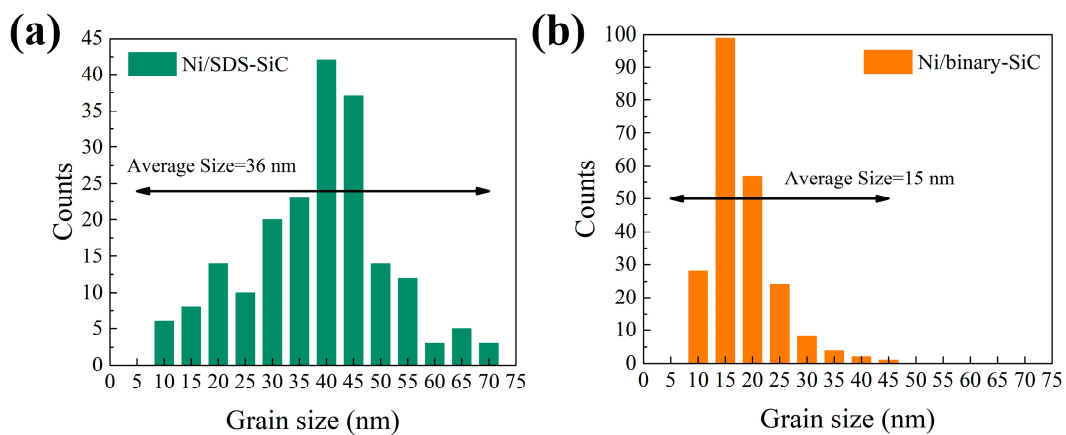

**Figure. S6** Grain size distribution diagram obtained by measurement statistics in TEM images. **(a)** Ni/SDS-SiC coating, **(b)** Ni/binary-SiC coating prepared at the current density of  $2.0 \text{ A dm}^{-2}$ .
